# Supplementary material
Source: PubMed Central journal article supplement (PMC3819293)
Supplement: NIHMS3609-supplement-Supplement.pdf [file NIHMS3609-supplement-Supplement.pdf]

A

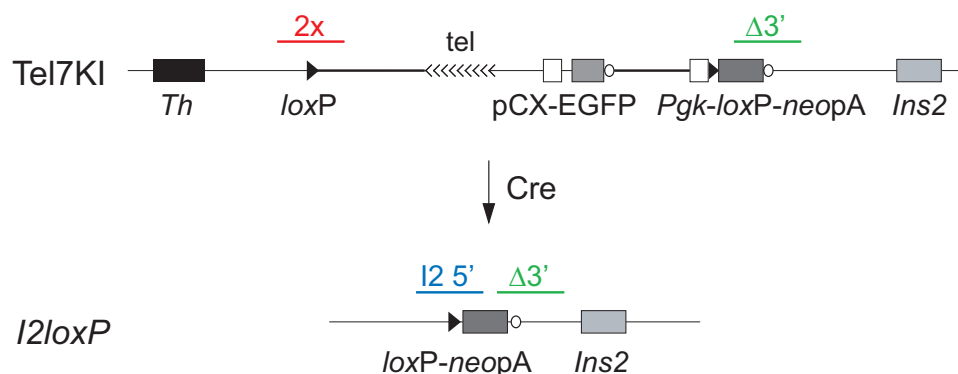

B

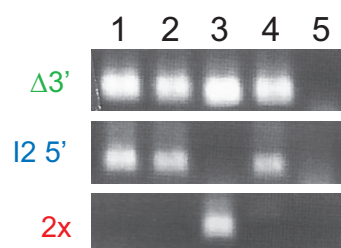

**Fig. S1. Demonstration of the conditional excision of *Tel7KI* with Cre in ES cells.**

(A) Schematic representation of the *Tel7KI* allele showing the conditional deletion of its *loxP* site-flanked elements, to reform the parental allele *I2loxP* by Cre excision. Diagnostic genomic PCR reactions amplifying a common element ( $\Delta 3'$ ) as well as unique junctions (2x, I2 5') are positioned above the schemata. (B) Analysis of independent ES cell clones obtained after the transient transfection of a *Tel7KI*/+ cell line with a Cre expression vector. The samples analyzed are genomic DNA purified from *Tel7KI*/+ ES cells with (1 and 2) and without Cre transfection (3), the parental *I2loxP*/+ cells (4) and a water control (5).

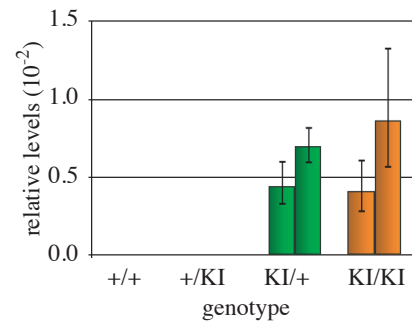

**Fig. S2. Q-RT-PCR analysis of GFP expression from Tel7KI**

GFP expression from Tel7KI was analyzed by quantitative RT-PCR on RNA purified from whole E12.5 embryos. Each bar represents a single embryo, and shows expression of EGFP transcript relative to Gapdh (10<sup>-2</sup> scale). Error bars indicate standard deviations for technical triplicates.

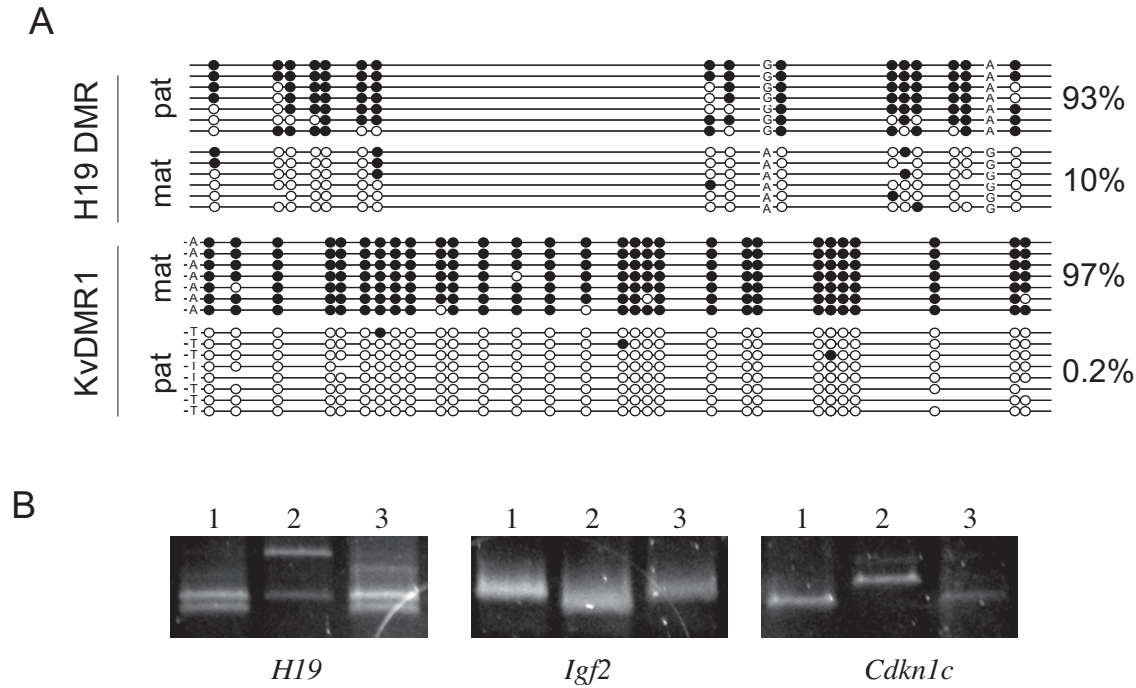

**Fig. S3. Genomic imprints are maintained in cultured trophoblast giant cells.**

(A) DNA methylation analysis of paternal transmission Tel7KI E8.5 EPCs differentiated into TGCs in vitro for 5 days. Sodium bisulfite-modified genomic DNA was analyzed for DNA methylation patterns at the *H19* DMR (IC1) as well as at KvDMR1 (IC2). The parental origin of the DNA strands analyzed was determined from sequence polymorphism within the regions studied (SNPs shown), such that each strand can be identified as being paternal (pat) or maternal (mat) in origin. *H19* DMR (16 CpGs in 473 bp) and KvDMR1 (31 CpGs in 335 bp) analysis has been previously described (Davis et al., 1998; Umlauf et al., 2004; Oh et al., 2008). (B) Allele-specific expression analysis of the distal Chr7 imprinted genes *H19*, *Igf2*, and *Cdkn1c*. Analysis was performed on F1 hybrid conceptuses from a cross between a Tel7KI hemizygous animal (+/KI, *mus* background) and an animal homozygous for *M.m.castaneus* (*cast*) variants on distal Chr 7 (E12.5 *cast/mus* embryo, lane 1, E12.5 *mus/cast* embryo, lane 2) and compared to *cast/mus* F1 EPCs cultured for 5 days (lane 3). Each cDNA sample was amplified to detect a SNP in the genes of interest. PCR products were digested with a polymorphic restriction enzyme to determine the parental origin of the expressed allele.

**Table S1. Oligonucleotides used in this study for genotyping, sodium bisulfite sequencing, quantitative RT-PCR.**

| Purpose                    | Sequence                         | Name        | Reference  |
|----------------------------|----------------------------------|-------------|------------|
| Genotyping (I2wt)          | AGCACAGTCCCCTGTGTTCT             | I2wt F      | This study |
|                            | GTCTTCAACCCCATGTGACC             | I2wt R      | This study |
| Genotyping ( $\Delta 5'$ ) | CCAAAGAACGGAGCCGGTTG             | PGK4        | (1)        |
|                            | TGAATGGGAAATGTGGTCCTTGG          | M2G         | (1)        |
| Bisulfite ( $\beta$ -a)    | GGAGAGGTGYGGYGGTAGTTAATTAGAG     | BABF6       | This study |
|                            | TCATTAAACCAAACRCTAATTACAACCC     | BABR4c      | This study |
|                            | AAACCCCTCAAAACTTTCACRCAACCACAA   | BABR5d      | This study |
| Bisulfite (GFP ORF)        | ATTATTTTCTAGATTGTTATGGTGAGTAAGGG | 1870Fbis    | (2)        |
|                            | GAGGAGTTGTTTATYGGGGTGGTGT        | 1903Fbis    | (2)        |
|                            | TAACTATTATAATTATACTCCAACCTTATACC | 2303Rbis    | (2)        |
| Bisulfite (H19 DMR)        | GAGTATTTAGGAGGTATAAGAATT         | BMsp2t1     | (3)        |
|                            | ATCAAAAACCTAACATAAACCCCT         | BHha1t3     | (3)        |
|                            | TGTAAGGAGATTATGTTTTATTTTTGGA     | BMsp2t2.2   | (1)        |
|                            | AACCTCATAAAACCCATAACTATA         | BHha1t4.2   | (1)        |
| Bisulfite (KvDMR1)         | GGTTATAAAGTTTAGGGGTTTTAGATTG     | Kcnq1ot1 OF | (4)        |
|                            | AAAACCTTTTCTATTCAACTTAATTCCCAAC  | Kcnq1ot1 OR | (4)        |
|                            | GGTTTTAAGATTATTTTTGTTTTGTAAAGT   | Kcnq1ot1 IF | (4)        |
|                            | AATTCTCCTAAATATAATTTTTTCTCAAC    | Kcnq1ot1 IR | (4)        |
| Q-PCR (GFP)                | GCTCTGACTGACCGCGTTACT            | BAE1F       | This study |
|                            | GGACACGCTGAACTTGTGG              | BAE1R       | This study |
| Q-PCR (G3PDH)              | ACCACAGTCCATGCCATCAC             | G3PF        | (1)        |
|                            | TCCACCACCCTGTTGCTGTA             | G3PR        | (1)        |

- Oh R, Ho R, Mar L, Gertsenstein M, Paderova J, Hsien J, Squire JA, Higgins M, Nagy A, Lefebvre L (2008) Epigenetic and phenotypic consequences of a truncation disrupting the imprinted domain on distal mouse chromosome 7. *Mol Cell Biol* 28:1092–1103.
- Dong KB, Maksakova IA, Mohn F, Leung D, Appanah R, Lee S, Yang HW, Lam LL, Mager DL, Schübeler D *et al.* (2008) DNA methylation in ES cells requires the lysine methyltransferase G9a but not its catalytic activity. *EMBO J* 27:2691–2701.
- Davis TL, Trasler JM, Moss SB, Yang GJ, Bartolomei MS (1999) Acquisition of the H19 methylation imprint occurs differentially on the parental alleles during spermatogenesis. *Genomics* 58:18–28.
- Umlauf D, Goto Y, Cao R, Cerqueira F, Wagschal A, Zhang Y, Feil R (2004) Imprinting along the Kcnq1 domain on mouse chromosome 7 involves repressive histone methylation and recruitment of Polycomb group complexes. *Nat Genet* 36:1296–1300.

**Table S2. Primer sequences for allele-specific RT-PCR**

| Name   | Sequence                 | Size | Enzyme         | Cast        | 129      | Ref         |
|--------|--------------------------|------|----------------|-------------|----------|-------------|
| H19rt1 | CCTCAAGATGAAAGAAATGGT    | 641  | <i>SmaI</i> /  | 244, 44,    | 244, 44, | (1)         |
| H19rt2 | AACACTTTATGATGGAACTGC    |      | <i>Cac81</i>   | 222, 130    | 352      |             |
| Igf2F  | CCATCAATCTGTGACCTCCTCTTG | 200  | <i>Tsp5091</i> |             |          | (2)         |
| Igf2R  | GGGTGTCAATTGGGTTGTTT     |      |                |             |          |             |
| P57S   | GCCAATGCGAACGACTTC       | 364  | <i>Taqα1</i>   | 257, 58, 49 | 306, 58  | (3); Mann,  |
| P574   | TACACCTTGGGACCAGCGTACTCC |      |                |             |          | unpublished |

1. Searle AG, Beechey CV (1990) Genome imprinting phenomena on mouse chromosome 7. *Genet Res* 56:237–244.
2. Oh R, Ho R, Mar L, Gertsenstein M, Paderova J, Hsien J, Squire JA, Higgins M, Nagy A, Lefebvre L (2008) Epigenetic and phenotypic consequences of a truncation disrupting the imprinted domain on distal mouse chromosome 7. *Mol Cell Biol* 28:1092–1103.
3. Doherty AS, Mann MR, Tremblay KD, Bartolomei MS, Schultz RM (2000) Differential effects of culture on imprinted H19 expression in the preimplantation mouse embryo. *Biol Reprod* 62:1526–1535.
